# Supplementary material for: Magnetic Extraction of Weathered Tire Wear Particles and Polyethylene Microplastics
Source: MDPI journal article supplement (doi:10.3390/polym14235189), 2022-11-29
Supplement: s1 [file s1]

Supplementary Material to:

# Magnetic Extraction of Weathered Tire Wear Particles and Polyethylene Microplastics

Vaibhav Budhiraja <sup>1,\*</sup>, Branka Mušič <sup>2,\*</sup> and Andrej Krzan <sup>1</sup>

1. Department of Polymer Chemistry and Technology, National Institute of Chemistry, Hajdrihova 19, 1000 Ljubljana, Slovenia
2. Slovenian National Building and Civil Engineering Institute, Dimičeva ulica 12, 1000 Ljubljana, Slovenia

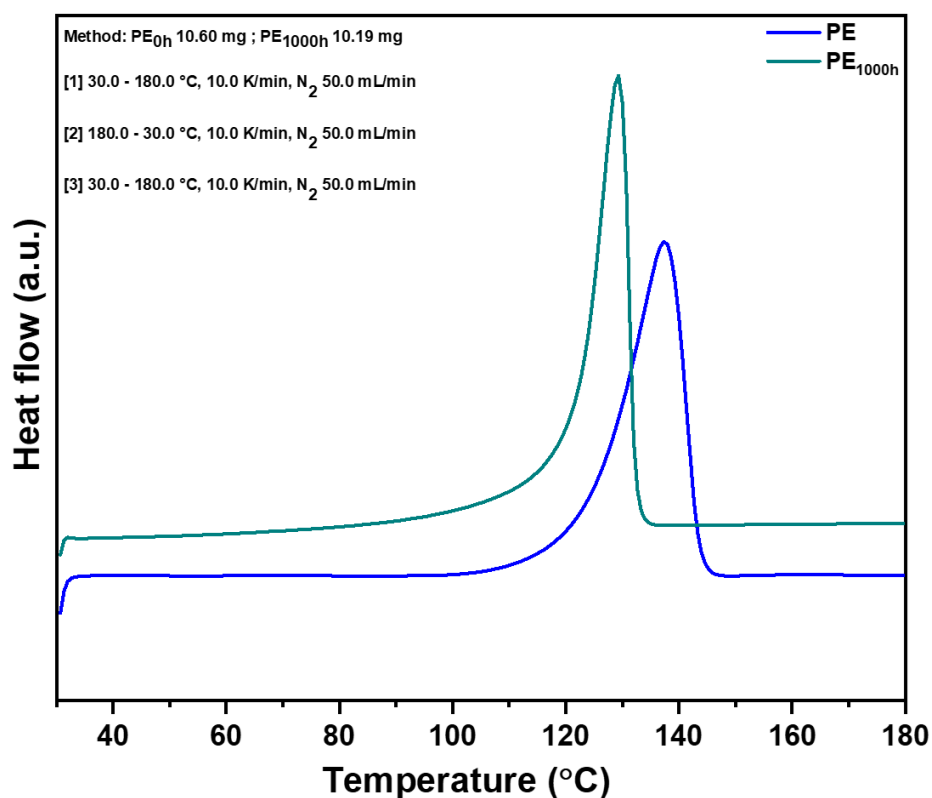

**Figure S1.** DSC of PE and weathered PE<sub>1000h</sub>

The DSC of PE and weathered PE<sub>1000h</sub> has been done with a Mettler Toledo, Greifensee, Switzerland TGA/DSC 1 thermogravimeter. The experiments were done in the temperature range of 30-180 °C in an environment of N<sub>2</sub>, with a flow rate of 50 mL/min and a heating rate of 10 K/min. The crystallinity of the PE is calculated using the formula;

$$\text{Degree of Crystallinity (\%)} = \frac{\Delta H_m \text{J/g (calculated)}}{\Delta H_m \text{J/g (100\%)}} \times 100$$

The melting enthalpy of a 100% crystalline PE used for calculation is 293 J/g. The crystallinity of pristine PE and weathered PE<sub>1000h</sub> is 74% and 68% respectively.

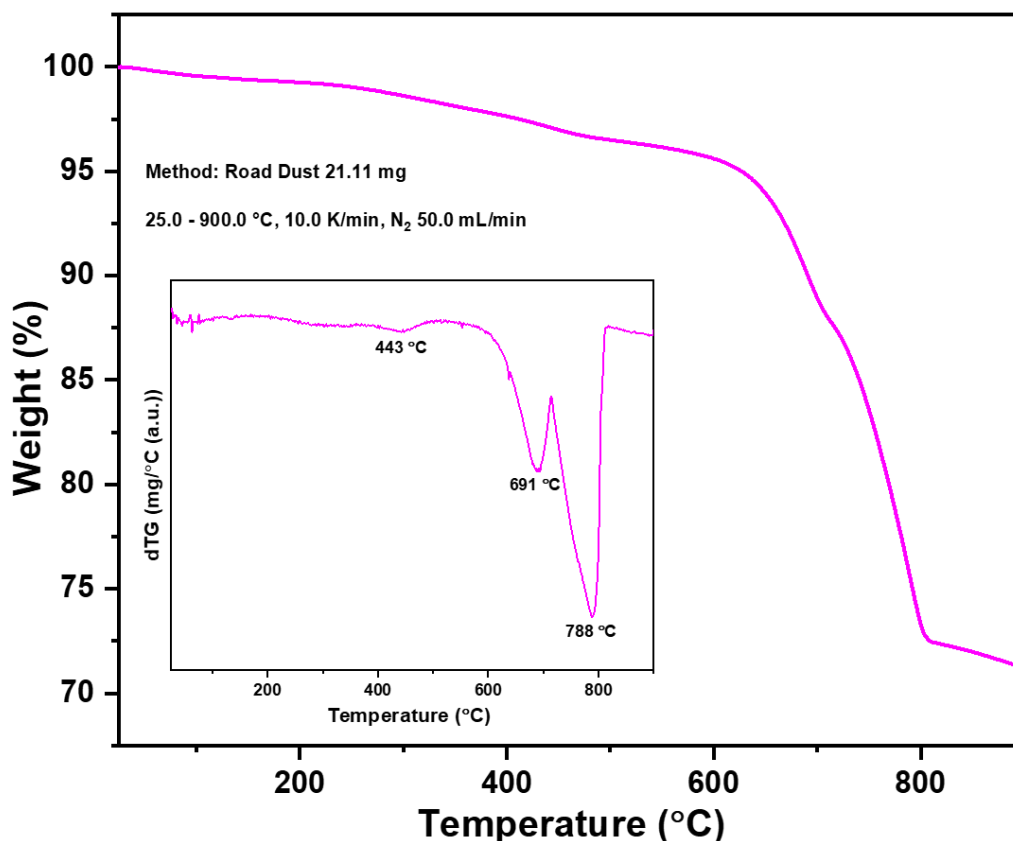

**Figure S2.** TGA of Road Dust. First differential is shown in the inset.

The TGA of road dust has been done with a Mettler Toledo, Greifensee, Switzerland TGA/DSC 1 thermogravimeter. The experiments were done in the temperature range of 25-900 °C in an environment of N<sub>2</sub>, with a flow rate of 50 mL/min and a heating rate of 10 K/min. The first derivative shows a mild peak at 443 °C which could be from the degradation of tire rubber. The peak at 691 °C could be from carbon black originating from the tire or any other source in the dust sample. The most prominent peak at 788 °C might be due to some inorganic impurities in the dust sample.
